# Supplementary material
Source: PubMed Central journal article supplement (PMC8491584)

# Oddball Reaction Time

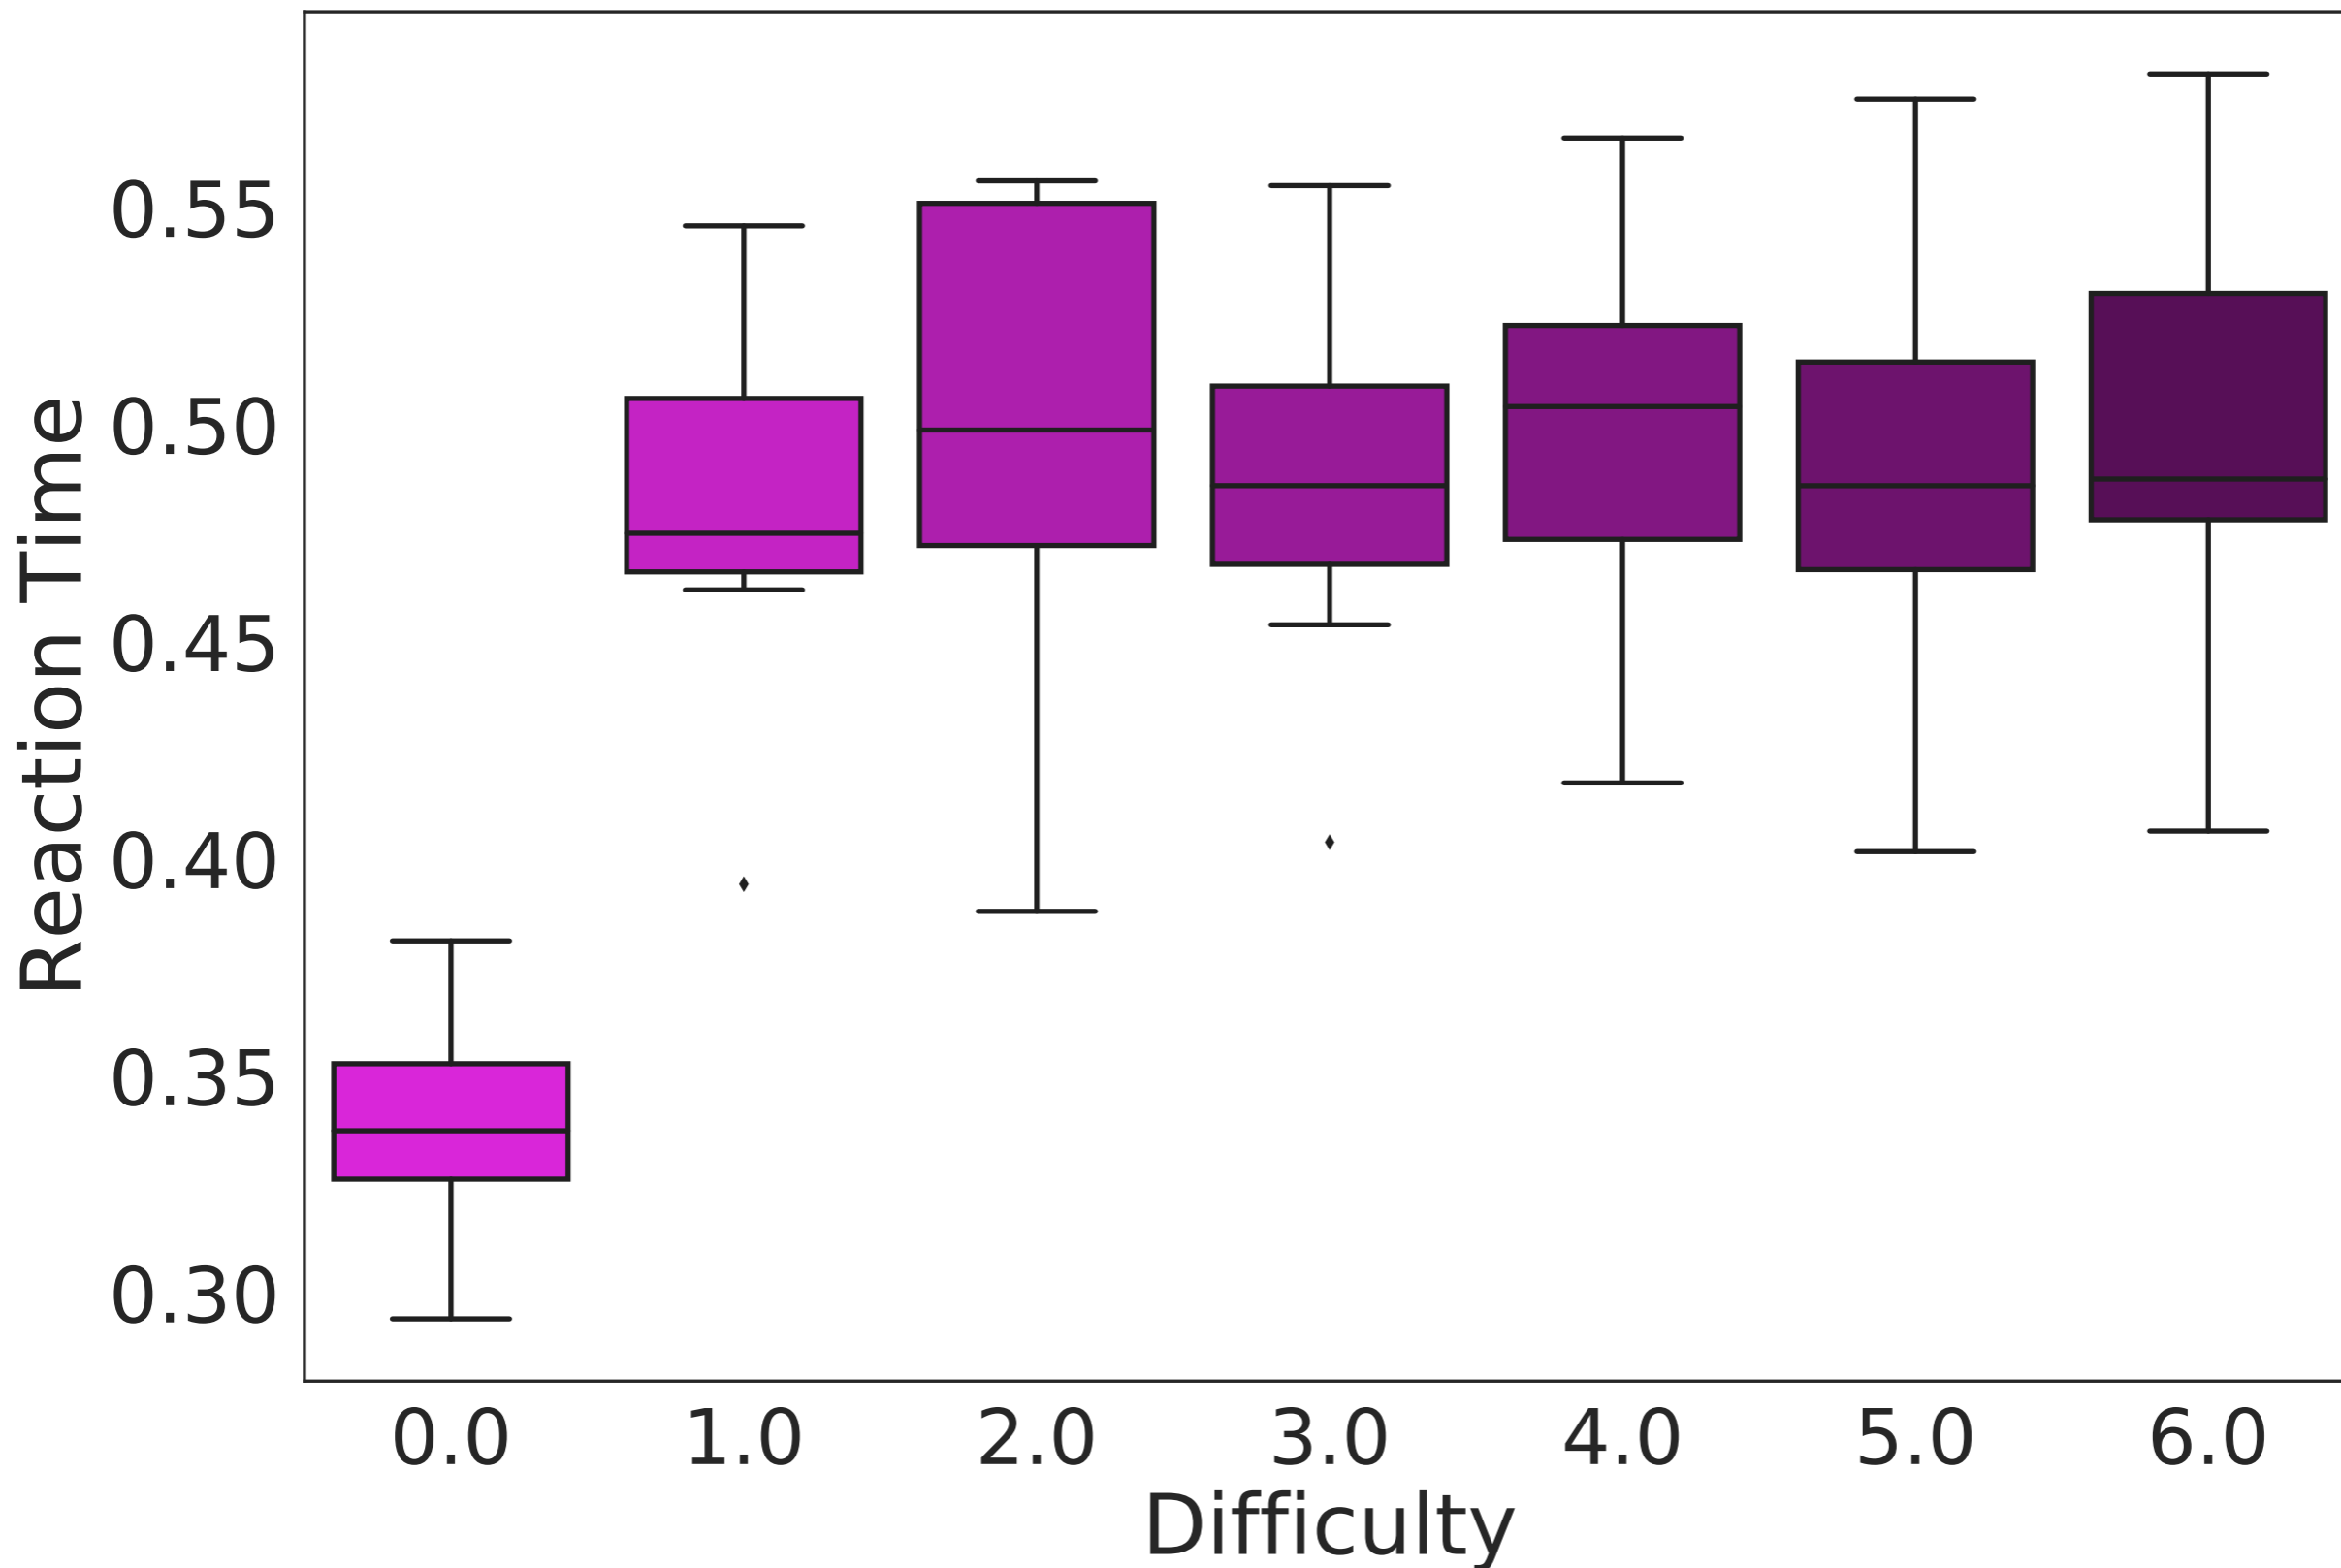

Supplement: NIHMS1693437-supplement-2.pdf [file NIHMS1693437-supplement-2.pdf]

# Tracking Error

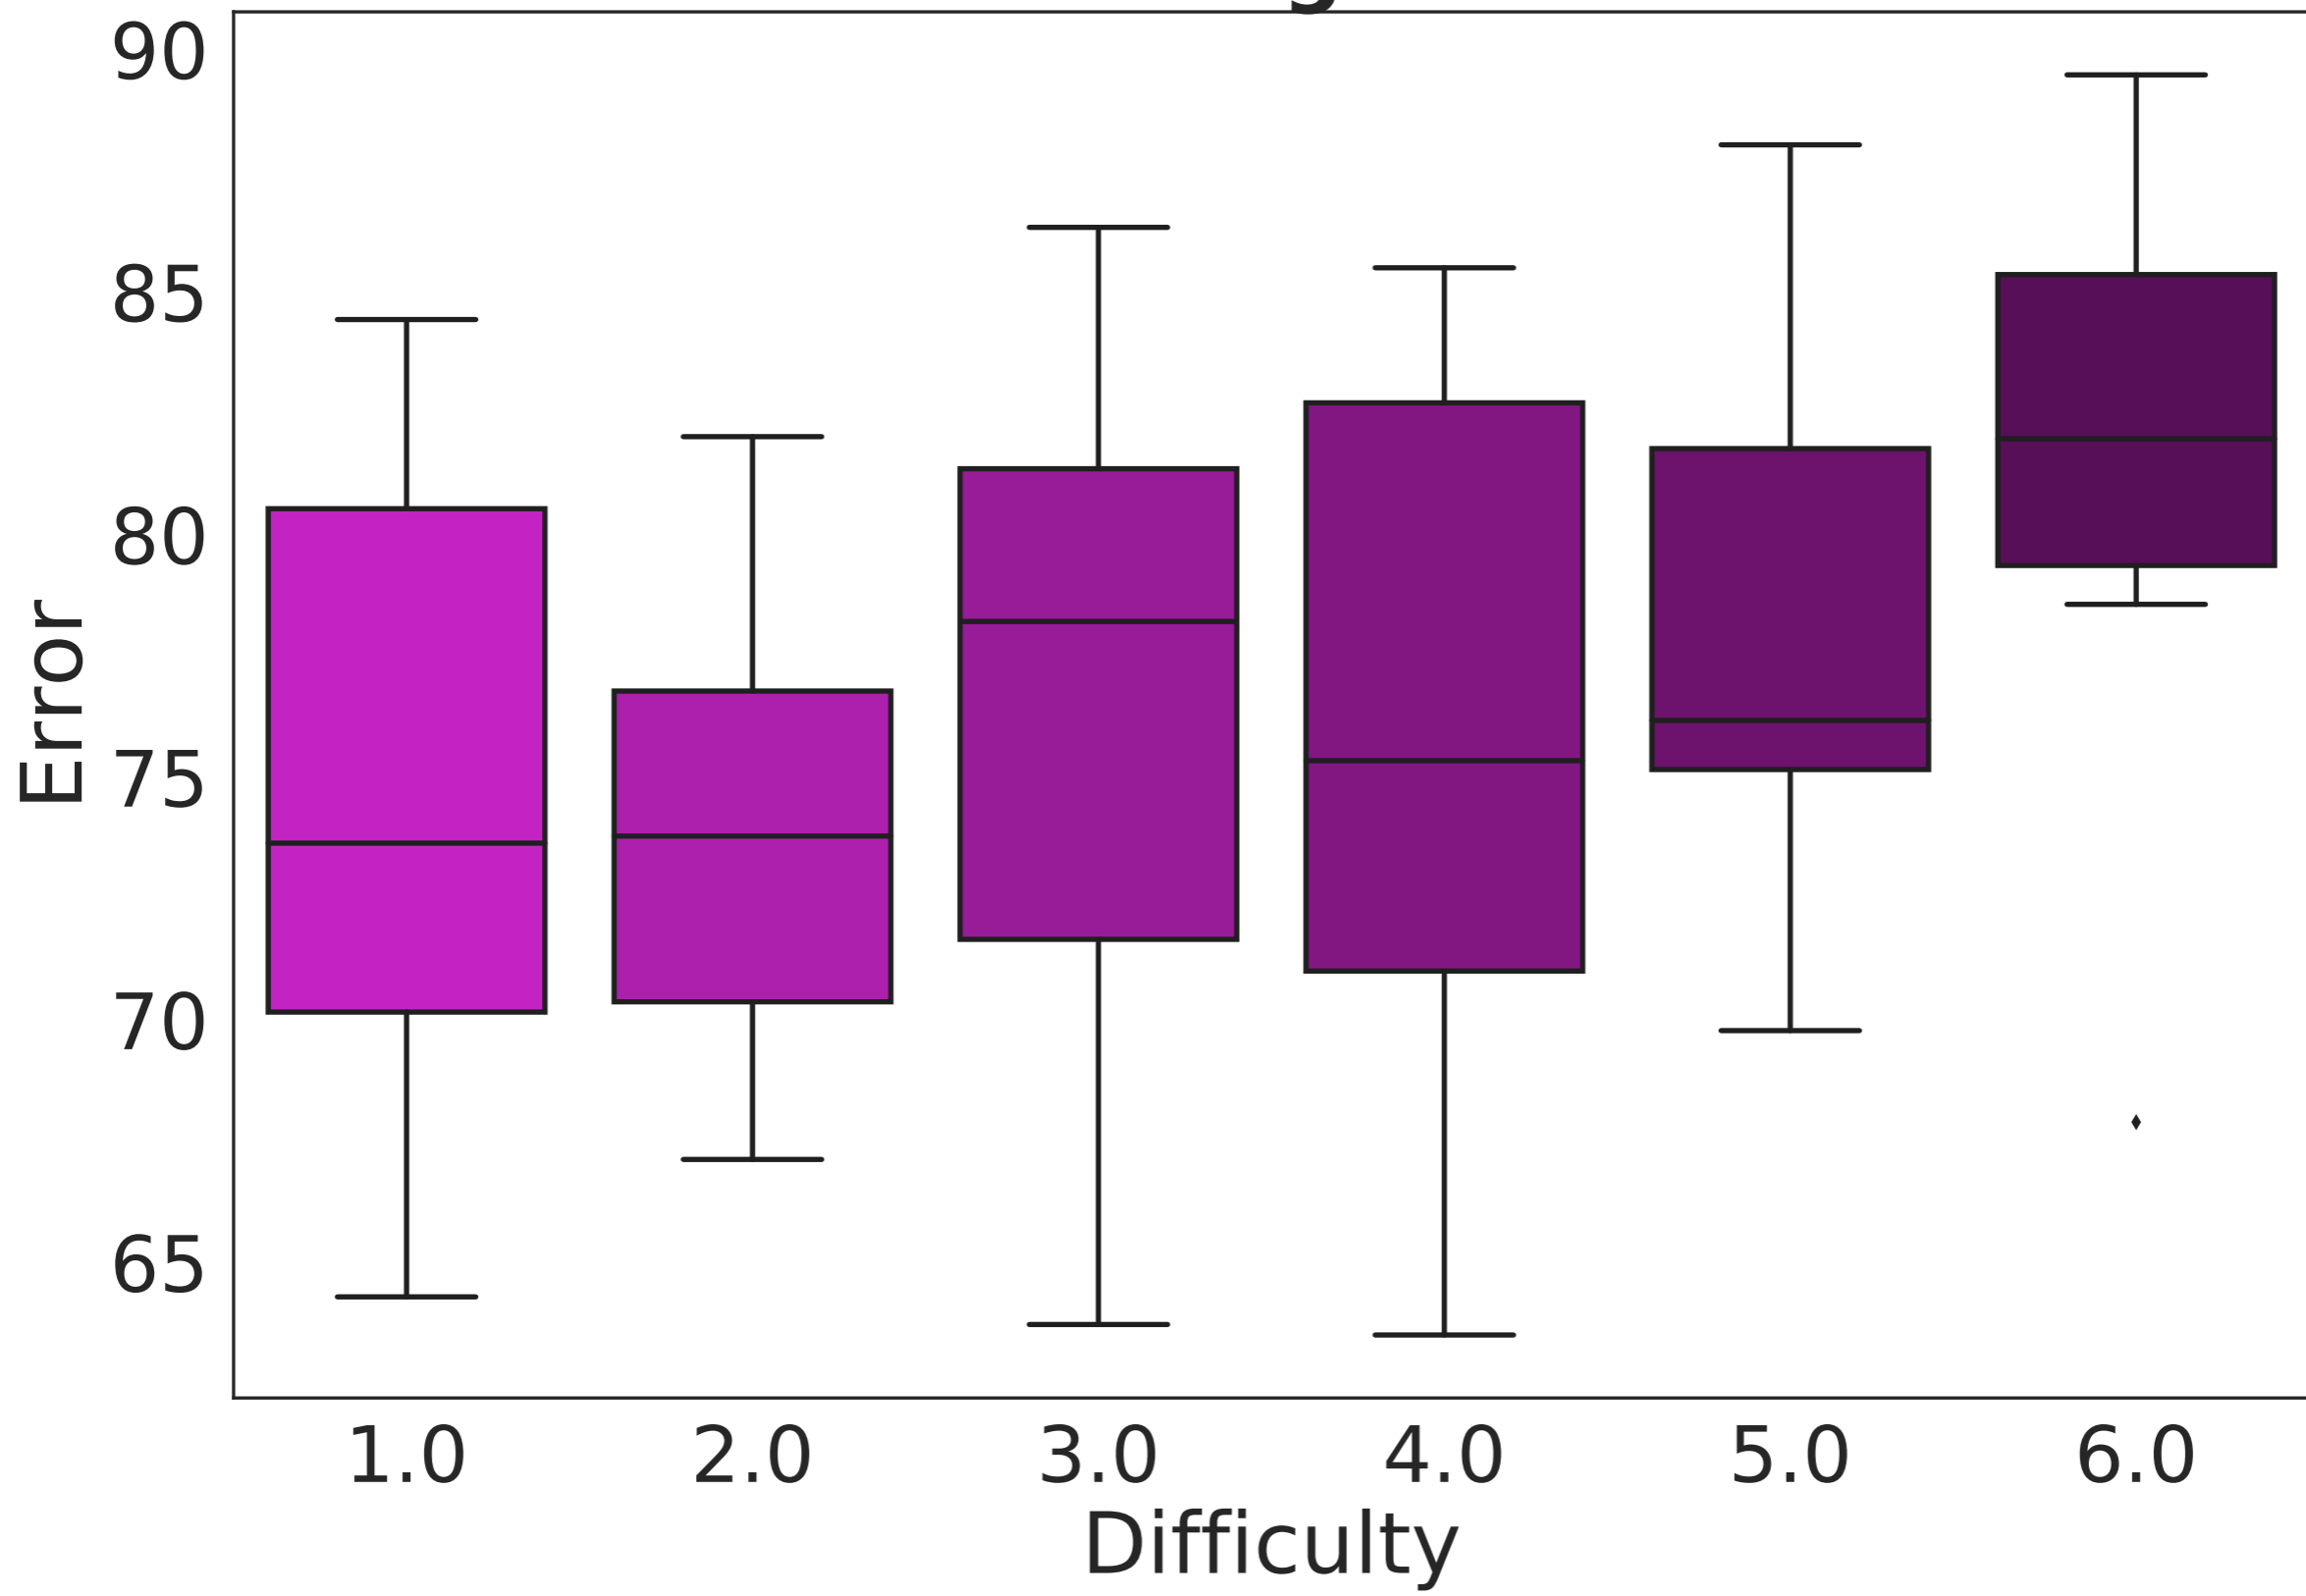

Supplement: NIHMS1693437-supplement-3.pdf [file NIHMS1693437-supplement-3.pdf]

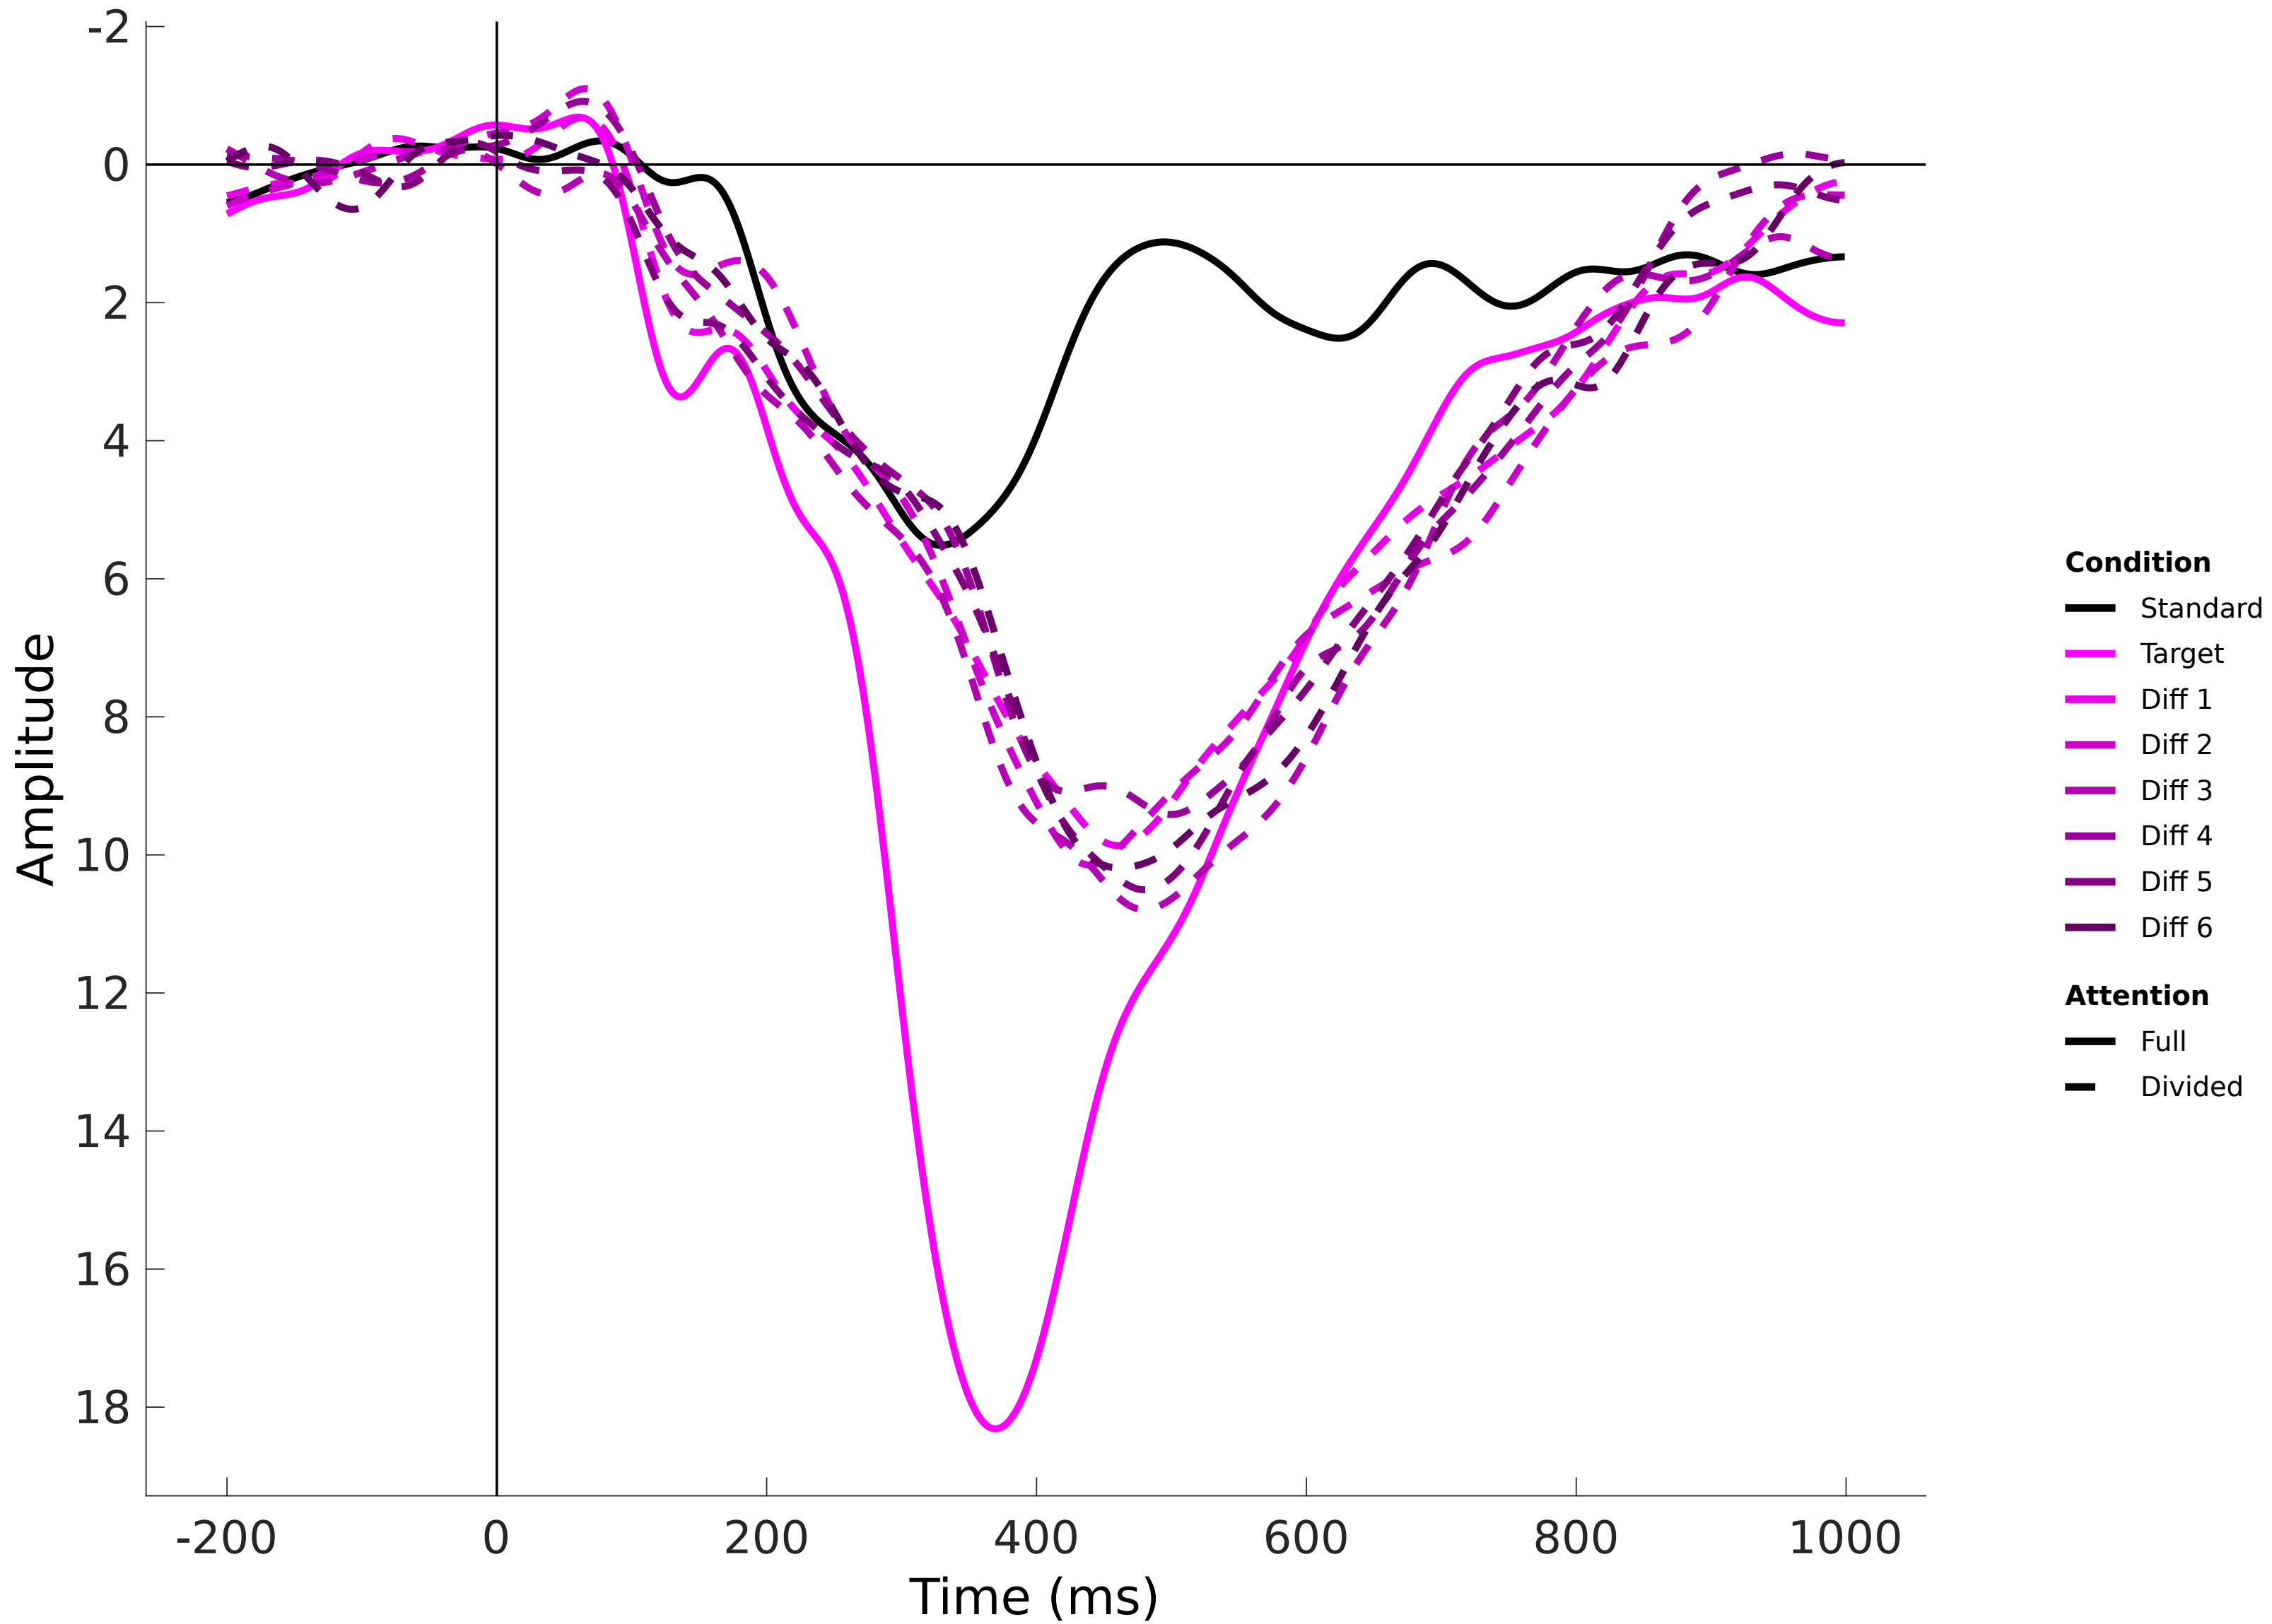

Supplement: NIHMS1693437-supplement-4.pdf [file NIHMS1693437-supplement-4.pdf]

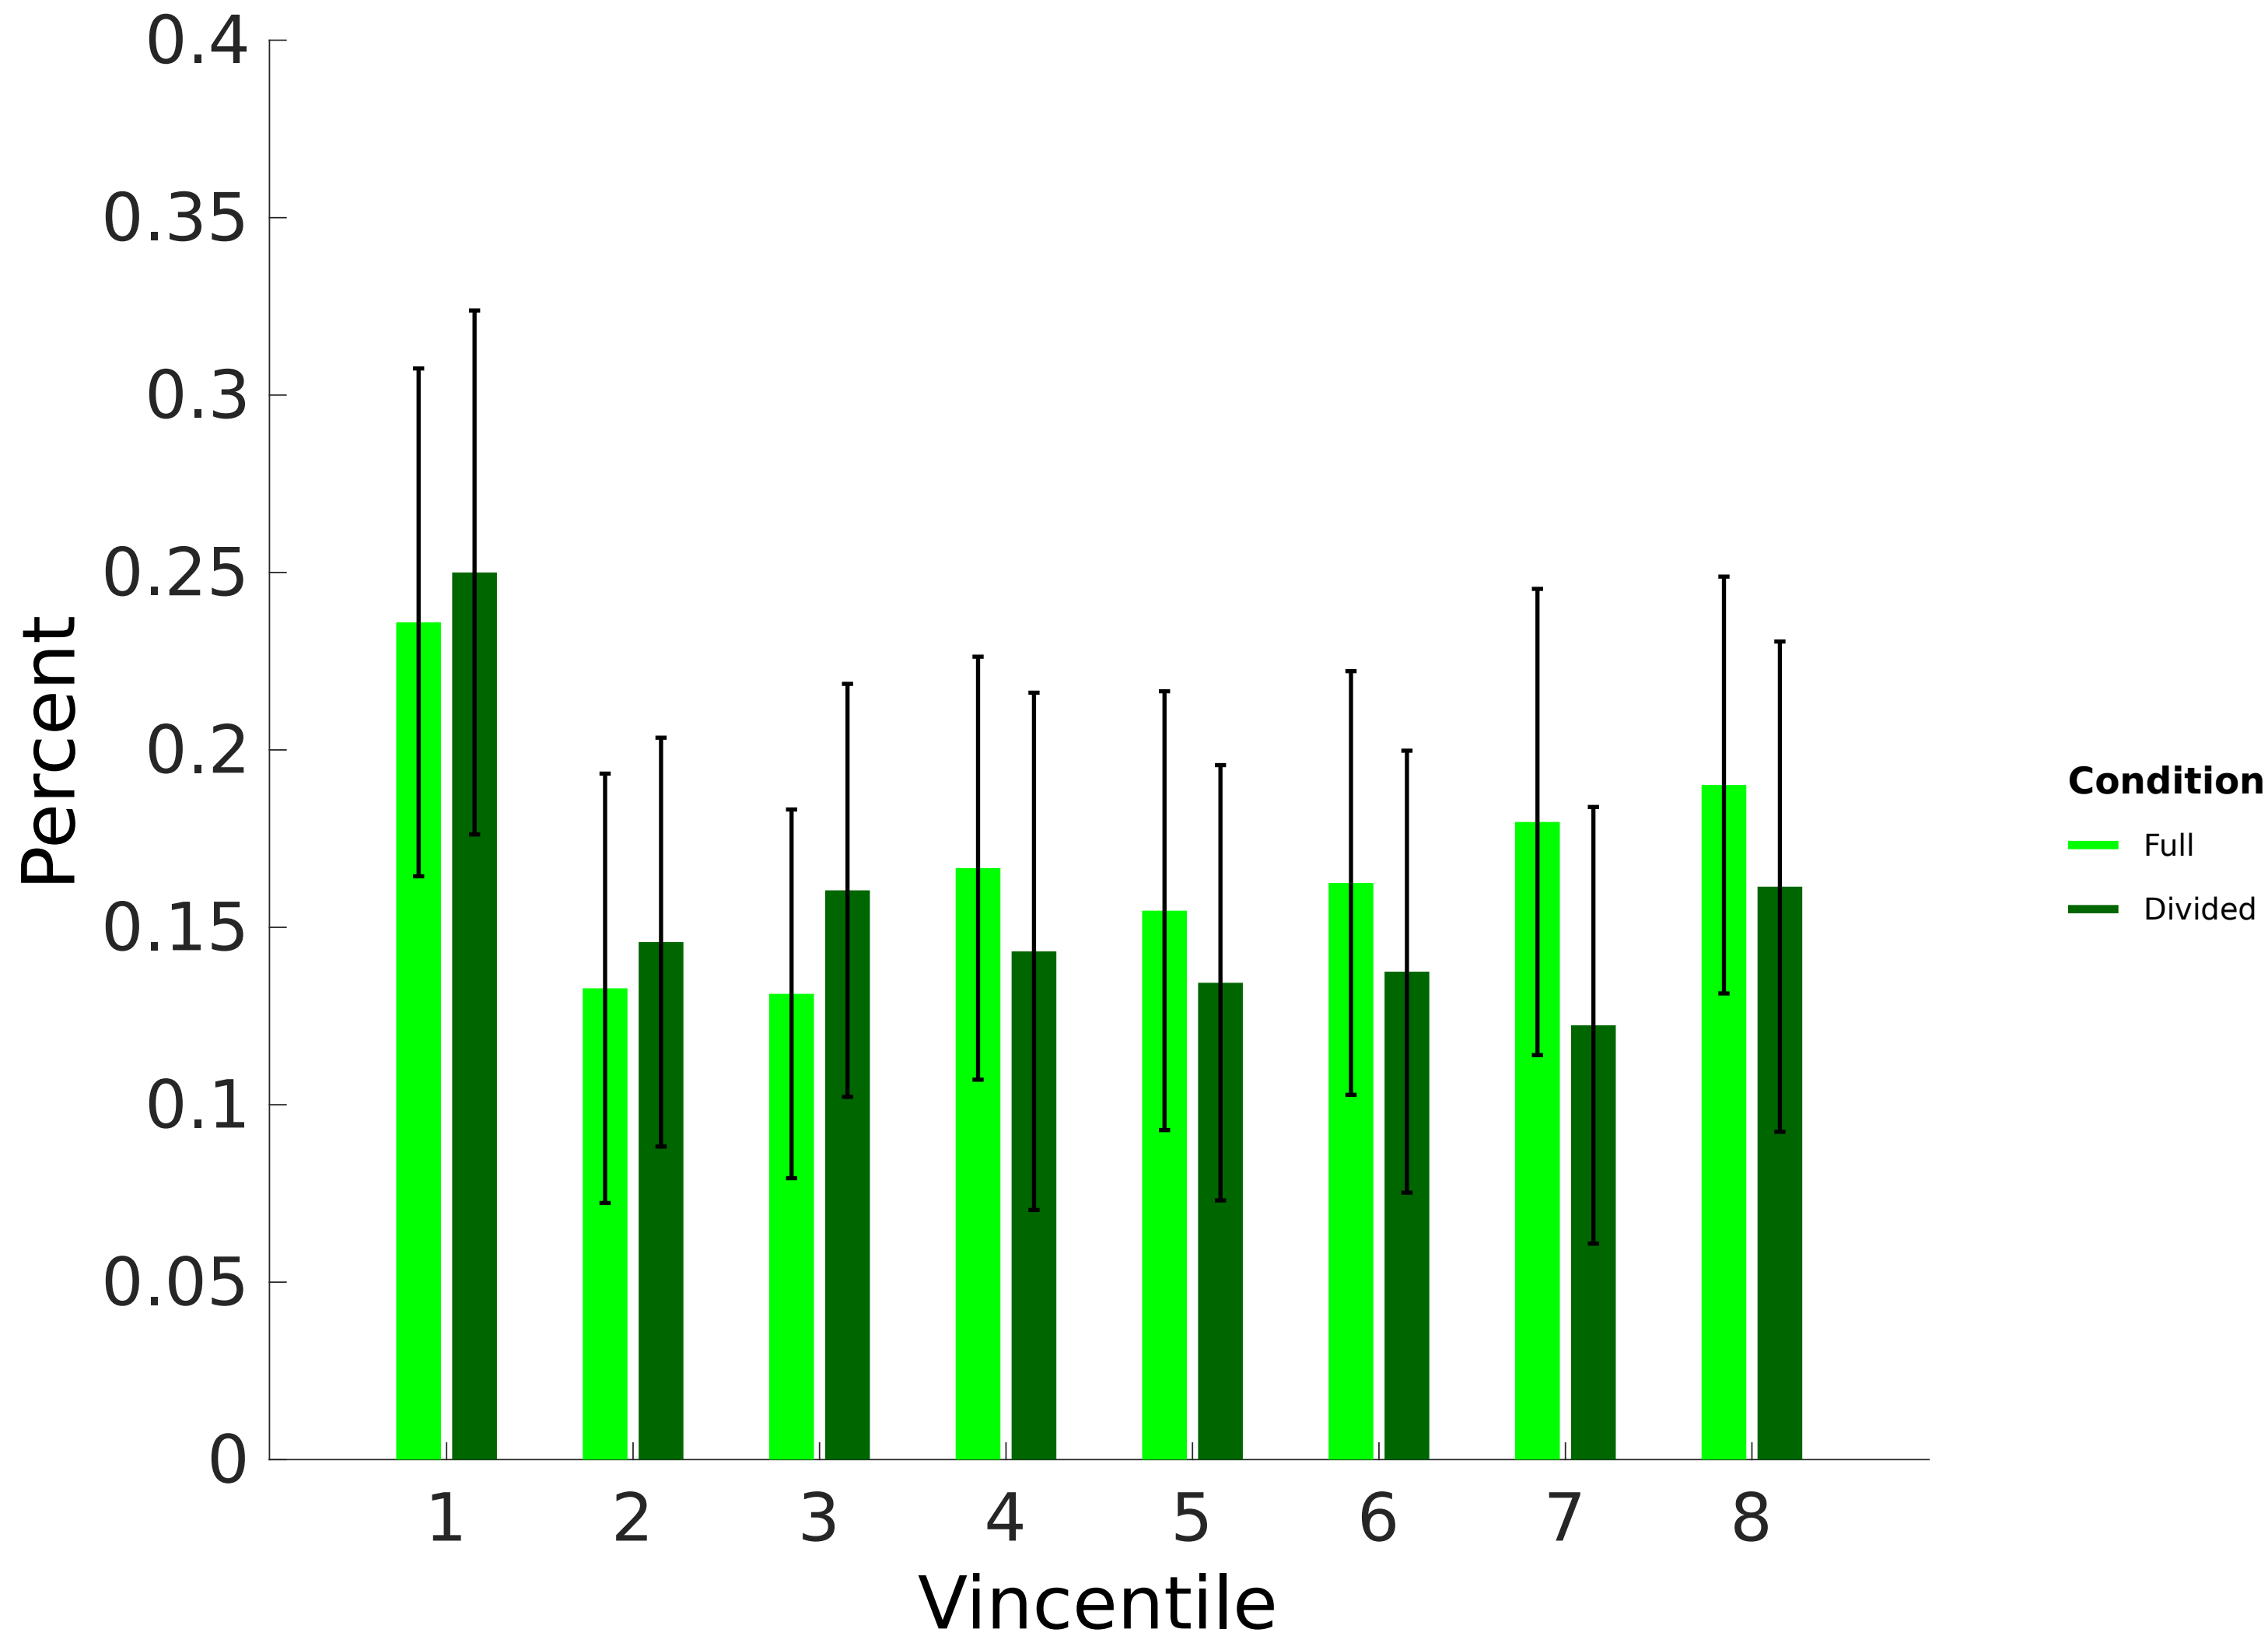

Supplement: NIHMS1693437-supplement-5.pdf [file NIHMS1693437-supplement-5.pdf]
